# Supplementary material
Source: PubMed Central journal article supplement (PMC2409244)

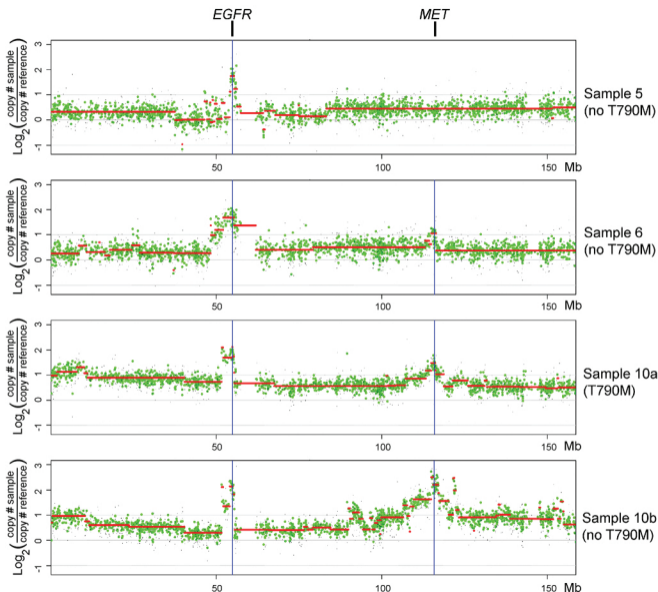

Supplement: pnas_0710370104_1.pdf [file pnas_0710370104_1.pdf]
