# Supplementary material
Source: PubMed Central journal article supplement (PMC2409244)

10  $\mu\text{m}$

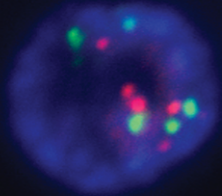

10  $\mu\text{m}$

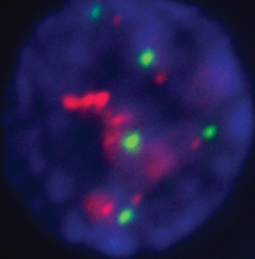

Supplement: pnas_0710370104_2.pdf [file pnas_0710370104_2.pdf]
